1 **The Integrative Conjugative Element (ICE) of *Mycoplasma agalactiae*: key elements**  
2 **involved in horizontal dissemination and influence of co-resident ICEs**

3

4 Eric Baranowski,<sup>a</sup> Emilie Dordet-Frisoni,<sup>a</sup> Eveline Sagné,<sup>a</sup> Marie-Claude Hygonenq,<sup>a</sup> Gabriela  
5 Pretre,<sup>a</sup> Stéphane Claverol,<sup>b</sup> Laura Fernandez,<sup>a</sup> Laurent Xavier Nouvel,<sup>a</sup> Christine Citti<sup>a#</sup>

6

7 IHAP, Université de Toulouse, INRA, ENVT, Toulouse, France<sup>a</sup> ; Pôle Protéomique, Centre de  
8 Génomique Fonctionnelle, Université de Bordeaux, Bordeaux, France<sup>b</sup>

9

10 Running Head: Functional genomics of mycoplasma ICEA

11 #Address correspondence to Christine Citti, [c.citti@envt.fr](mailto:c.citti@envt.fr)

12

13 **ABSTRACT (247/250)**

14 The discovery of integrative conjugative elements (ICEs) in wall-less mycoplasmas and the  
15 demonstration of their role in massive gene flows within and across species has shed new  
16 light on the evolution of these minimal bacteria. Of these, ICEA of the ruminant pathogen  
17 *Mycoplasma agalactiae* represents a prototype and belongs to a new clade of the Mutator-  
18 like superfamily that has no preferential insertion site and often occurs as multiple  
19 chromosomal copies. Here, functional genomics and mating experiments were combined to  
20 address ICEA functions and define the minimal ICEA chassis conferring conjugative  
21 properties to *M. agalactiae*. Data further indicated a complex interaction among co-resident  
22 ICEAs, since the minimal ICEA structure was influenced by the occurrence of additional ICEA  
23 copies that can *trans*-complement conjugative-deficient ICEAs. However, this cooperative

24 behavior was limited to the CDS14 surface lipoprotein, which is constitutively expressed by  
25 co-resident ICEAs, and did not extend to other ICEA proteins including the *cis*-acting DDE  
26 recombinase and components of the mating channel whose expression was only sporadically  
27 detected. Remarkably, conjugative-deficient mutants containing a single ICEA copy knocked-  
28 out in *cds14* can be complemented by neighboring cells expressing CDS14. This result,  
29 together with the conservation of CDS14 functions in closely related species, may suggest a  
30 way for mycoplasma ICEs to extend their interaction outside of their chromosomal  
31 environment. Overall, this study provides a first model of conjugative transfer in  
32 mycoplasmas and offers valuable insights towards the understanding of horizontal gene  
33 transfer in this highly adaptive and diverse group of minimal bacteria.

34 **IMPORTANCE** (150/150 words)

35 Integrative conjugative elements (ICEs) are self-transmissible mobile genetic elements that  
36 are key mediators of horizontal gene flow in bacteria. Recently, a new category of ICEs has  
37 been identified that confer conjugative properties to mycoplasmas, a highly adaptive and  
38 diverse group of wall-less bacteria with reduced genomes. Unlike classical ICEs, these mobile  
39 elements have no preferential insertion specificity and multiple mycoplasma ICE copies can  
40 be found randomly integrated into the host chromosome. Here, the prototype ICE of  
41 *Mycoplasma agalactiae* was used to define the minimal conjugative machinery and propose  
42 the first model of ICE transfer in mycoplasmas. This model unveils the complex interactions  
43 taking place among co-resident ICEs and suggests a way for these elements to extend their  
44 influence outside of their chromosomal environment. These data pave the way for future  
45 studies aiming at deciphering chromosomal transfer, an unconventional mechanism of DNA  
46 swapping that has been recently associated with mycoplasma ICEs.

## 47 INTRODUCTION

48 Integrative conjugative elements (ICEs) are self-transmissible mobile genetic elements that  
49 are key mediators of horizontal gene flow in bacteria (1). These self-transmissible elements  
50 encode their excision, transfer by conjugation and integration into the genome of the  
51 recipient cell where they replicate as a part of the host chromosome. Recently, a new family  
52 of self-transmissible integrative elements has been identified in the genome of several  
53 mycoplasma species that confers conjugative properties to this important group of bacteria  
54 (2–8).

55 Mycoplasmas are well-known for having some of the smallest genomes thus far  
56 characterized in free-living organisms, with many species being successful human and animal  
57 pathogens (9, 10). Mycoplasmas belong to the class Mollicutes, a large group of atypical  
58 bacteria that have evolved from low GC, Gram-positive common ancestors (11). For decades,  
59 their evolution has been considered as marked by a degenerative process, with successive  
60 losses of genetic material resulting in current mycoplasmas having no cell wall and limited  
61 metabolic capacities (9). The recent discovery of massive horizontal gene transfer (HGT) in  
62 mycoplasmas has shed new light on the dynamics of their reduced genomes (12, 13).  
63 Evidence for HGT in these minimal bacteria came from the identification of putative ICEs in  
64 several species together with *in silico* data suggesting that mycoplasma species of distant  
65 phylogenetic groups have exchanged a significant amount of chromosomal DNA (14).

66 Conjugative properties of mycoplasmas were further demonstrated using the ruminant  
67 pathogen *Mycoplasma agalactiae* as a model organism (7, 12). In this species, mating  
68 experiments and associated next generation sequencing established that mycoplasma ICEs  
69 (MICEs) are self-transmissible mobile elements conferring the recipient cells with the

70 capacity to conjugate (Fig. 1). These uncovered at the same time an unconventional  
71 conjugative mechanism of chromosomal transfers (CTs), which involved large chromosomal  
72 regions and were independent of their genomic locations (12). While ICE self-dissemination  
73 was documented from ICE-positive to ICE-negative cells, CTs were observed in the opposite  
74 direction resulting in the incorporation of large genomic regions (Fig. 1). Remarkably, CTs can  
75 mobilize up to 10 % of the mycoplasma genome in a single conjugative event generating a  
76 complex progeny of chimeric genomes that may resemble conjugative distributive transfers  
77 in *Mycobacterium smegmatis* (15). While ICE and CTs appeared as two independent events,  
78 CTs rely on ICE factors most likely for providing the conjugative pore.

79 Of the MICEs so far described, the ICE of *M. agalactiae* (ICEA) has been most extensively  
80 studied (3, 16). ICEA and MICEs in general belong to a new family of self-transmissible  
81 integrative elements that rely on a DDE transposase of the prokaryotic Mutator-like family  
82 for their mobility (7, 17). Mainly associated with small and simple transposons such as  
83 insertion sequences, DDE transposases are also encoded by more complex mobile elements,  
84 such as streptococci TnGBS conjugative transposons (17). Unlike TnGBS that have a  
85 preferential insertion upstream of  $\sigma$ A promoters, ICEA integration occurs randomly in the  
86 host chromosome generating a diverse population of ICEA-transconjugants (7, 17). This  
87 situation also contrasts with more conventional ICEs, which encode site-specific tyrosine  
88 recombinases (1). ICEA occurrence varies among *M. agalactiae* strains with strain 5632  
89 containing three nearly identical ICEA copies and PG2 that contains no ICE, or a vestigial  
90 form (14, 16). Functional ICEAs are about 27 kb long and are composed of 23 genes (Fig. 1),  
91 most of which encode proteins of unknown function (Table S1) with no homolog outside of  
92 the Mollicutes (3). Among the few exceptions are CDS5 and CDS17, two proteins with

93 similarity to conjugation-related TraG/VirD4 and TraE/VirB4, respectively (Table S1). Both  
94 proteins are energetic components of the type IV secretion systems, which are usually  
95 involved in DNA transport (18).

96 The establishment of laboratory conditions in which ICE transfer can be reproduced and  
97 analyzed in *M. agalactiae* (7), together with the development of specific genetic tools for the  
98 manipulation of this species (19), offer a unique opportunity to further investigate the  
99 detailed mechanisms underlying HGTs in mycoplasmas. In the present study, a transposon-  
100 based strategy was devised to knock-out individual ICEA genes and to decipher ICEA  
101 functions in *M. agalactiae*. Data showed that the minimal ICEA chassis required for  
102 conferring conjugative properties to *M. agalactiae* was influenced by the occurrence of  
103 additional ICEA copies that can *trans*-complement conjugative-deficient ICEAs.  
104 Complementation studies further unveil the complexity of this interplay that can even  
105 extend to neighboring cells and the key role played by the co-resident ICEA expression  
106 pattern. This study is a first step towards understanding HGT in mollicutes and provides a  
107 valuable experimental framework to decipher the mechanisms of DNA exchange in more  
108 complex bacteria when associated with this new category of mobile elements.

## 109 **RESULTS**

110 **Conjugative properties of *Mycoplasma agalactiae* mutated ICEA.** To elucidate the  
111 molecular mechanisms underlying ICE conjugative transfer in *M. agalactiae*, a library of  
112 1,440 individual mutants was generated by random insertion of a mini-transposon (mTn) in  
113 the genome of strain 5632 that contains three nearly identical copies of a functional ICEA  
114 (Fig. 1). Mating experiments were conducted using pools of 96 individual 5632-mutants as  
115 donors and a pool of five PG2 recipient clones to avoid possible bias associated with a

116 particular variant. Donors and recipients were chosen to carry compatible antibiotic markers  
117 (see Material and Methods) and resulting transconjugants were obtained with a frequency  
118 ranging from  $2 \times 10^{-9}$  to  $8 \times 10^{-8}$  transconjugants/total CFUs, as expected for 1:10 ratio  
119 (5632:PG2) that favors ICEA transfer from 5632 to PG2 (7). Double-resistant colonies were  
120 further subjected to detailed genetic analysis to (i) identify ICEA-positive PG2 versus 5632  
121 having acquired PG2 genomic materials by CTs, and (ii) map the mTn position within ICEA-  
122 positive PG2 transconjugants. This strategy allowed the identification of 27 unique mutant  
123 ICEAs (Fig. 2A and Table S2). Remarkably, mTn insertions were found to cluster within a  
124 6.4-kb ICEA region spanning *cdsE* to *cdsH* with the exception of three inserted in the non-  
125 coding regions *ncr1/A* and *ncr36/22* (Fig. 2A, mutants 3, 5 and 47), and one inserted in *cds11*  
126 (Fig. 2A, mutant 7).

127 Since PG2 transconjugants contain no co-resident ICEA copies (Fig. S1), mating experiments  
128 were performed to evaluate the conjugative properties of selected mutant ICEAs (Fig. 2A).  
129 Individual PG2 transconjugants (further designated as PG2 ICEA) were mated with a pool of  
130 five ICEA-negative PG2 clones as recipient cells (Fig. 2C). The PG2 ICEA cells carrying a mTn  
131 inserted in *ncr1/A*, *ncr19/E* and *ncr36/22* (Fig. 2A and 2C, mutants 3, 22, 23 and 47)  
132 displayed comparable mating frequencies ( $1.9$  to  $3.5 \times 10^{-6}$  transconjugants/total CFUs)  
133 suggesting that mTn insertions in these regions had no or minimal effect on conjugation.  
134 Conversely, mating experiments involving *cds14* knock-out ICEAs (Fig. 2A and 2C, mutants  
135 28, 31, and 33) as in PG2 ICEA donor cells confirmed the essential role previously recognized  
136 for this gene (7), and further indicated that *cds14* can be complemented *in trans* by co-  
137 resident ICEA copies, such as in 5632. The insertion of a mTn in *cds11*, *cdsE*, *cdsF* and *cdsH*  
138 (Fig. 2A and 2C, mutants 7, 25-26, 35-36, and 43-44) did not abrogate ICEA transfer, but

139 several mutant ICEAs displayed a reduced capacity to self-disseminate. Whether the  
140 conjugative properties of these PG2 ICEA cells may be influenced by the chromosomal  
141 position of the integrated ICEA is unknown. However, similar mating frequencies (4 to 5  
142  $\times 10^{-8}$  transconjugants/total CFUs) were observed for two PG2 transconjugants sharing the  
143 same mutant ICEA (Fig. 2C, mutant 7) integrated at different chromosomal sites (genomic  
144 positions 395291 and 433901). These results identified *cdsE*, *cdsF*, *cdsH*, and to a lesser  
145 extent *cds11*, as dispensable for ICEA self-dissemination.

146 **The minimal ICE chassis that confers conjugative properties to *Mycoplasma agalactiae*.** As  
147 shown above, mutant ICEs recovered in PG2 transconjugants displayed a biased distribution  
148 of their mTn insertions (Fig. 2A). This raised the question of the representativity of the 5632  
149 library and thus a PCR-based screening strategy for the direct identification of mutant ICEAs  
150 in 5632 was developed: mTn insertions across the entire ICEA were searched by a series of  
151 PCR assays using one primer matching each end of the mTn and one specific-ICEA primer  
152 selected from a set of oligonucleotides spanning the whole ICEA region. Amplifications were  
153 performed using pools of 96 individual mutants until one mTn insertion event per gene was  
154 detected, and positive pools were further characterized down to the single-mutant level. For  
155 each mutant, the mTn insertion was mapped by genomic DNA sequencing that also  
156 confirmed the presence of a single mTn per chromosome. Finally, the distribution of mTn  
157 insertions among the three ICEA copies of 5632 was determined by long-range PCR  
158 amplifications using mTn specific primers and a panel of oligonucleotides that are  
159 complementary to genomic DNA regions surrounding each ICEA copy. This strategy led us to  
160 identify 35 unique mutants (Table S2) among the three ICEA copies of 5632 (ICEA-I 29%;  
161 ICEA-II 37%; ICEA-III 34%). This time, mTn insertions were found broadly distributed

162 throughout the entire ICEA locus with the exception of several genes all characterized by a  
163 small size ranging from 0.20 to 0.65 kb (*cds12*, *cdsB*, *cdsD*, *cds13*, *cds27* and *cds36*). These  
164 findings indicate that the particular set of mutant ICEAs selected above in PG2 cannot be  
165 simply explained by a poor representativity of the 5632 mutant library.

166 The 51 mutant ICEAs identified in 5632, either by PCR screening or by mating experiments,  
167 are illustrated in Figure 2B. Out of 35 mutant ICEAs identified by PCR, 24 did not correspond  
168 to detectable PG2 transconjugants previously obtained (compare Fig. 2A and 2B) suggesting  
169 that these mutant ICEAs have lost their capacity to disseminate from 5632 to PG2. This was  
170 confirmed by mating using individually each of these 5632 mutants as ICEA donor (Fig. 2D)  
171 and by further analyses of their progeny. Results showed that when transconjugants were  
172 obtained all displayed the 5632 genomic backbone of the mutant and correspond to 5632  
173 having acquired the second PG2 antibiotic marker upon CTs. This was true for all but for  
174 5632 mutant 23 (mTn inserted in *ncr19/E* with no influence on conjugation) that was used as  
175 a positive control for ICEA transfer and generated up to 97% of PG2 transconjugants (Fig. 2D,  
176 mutant 23).

177 Overall, these results indicate that ICEA transfer can be abrogated or strongly affected by  
178 disrupting the genes encoding CDSs 1, A, C, 5, 7, 15, 16, 17, 19, 30, G or 22 in 5632 (Fig. 2B).  
179 Unlike *cds14* knock-out ICEAs, the conjugative properties of these mutant ICEAs cannot be  
180 restored by co-resident ICEA copies. Finally, ICEA transfer was also abrogated by mTn  
181 insertion in *ncrD/5* and *ncr16/27* (Fig. 2B, mutants 10 and 18) raising questions about the  
182 presence of regulatory and/or *cis*-acting elements (*e.g.*, *oriT*) in these regions. Whether short  
183 genes (< 0.65 kb) with no mTn insertion may encode essential functions remains to be  
184 further investigated.



185 **ICEA transfer in *Mycoplasma agalactiae* requires the CDS14 surface lipoprotein.** The CDS14  
186 lipoprotein is essential for mycoplasma conjugation and contains a 27 aa signal sequence  
187 (Fig. S2) that is characteristic of surface exposed lipoproteins in *M. agalactiae*. CDS14 surface  
188 location was confirmed in ICEA-positive cells by colony blotting assays using a specific anti-  
189 serum (Fig. 3A) and is in agreement with proteomic data showing an association of CDS14  
190 with the Triton X-114 hydrophobic fraction obtained after mycoplasma partitioning (16).  
191 Western blot analyses of 5632[ICEA *cds14*::mTn]<sup>G</sup>28 (mutant 28 in Fig. 2B and Table S2)  
192 having one of the three ICEA copies with a knock-out *cds14* further demonstrated that this  
193 lipoprotein can be expressed by co-resident ICEAs (Fig. 3B). This explains the capacity of  
194 *cds14* knock-out ICEAs to be horizontally transferred from 5632 cells observed above.

195 The role of the CDS14 lipoprotein was further investigated by using the conjugative-deficient  
196 PG2<sup>E</sup>[ICEA *cds14*::mTn]<sup>G</sup>28 having a only one ICEA copy with a mTn inserted in *cds14*.  
197 Complementation studies confirmed that the conjugative properties of this mutant can be  
198 restored upon transformation with plasmid pO/T-CDS14 that expresses the wild-type CDS14,  
199 but not with the empty vector (Table 1, matings A and B). Remarkably, transformation of  
200 ICE-negative recipient cells with pO/T-CDS14 also restored the conjugative properties of  
201 PG2<sup>E</sup>[ICEA *cds14*::mTn]<sup>G</sup>28 (Table 1, mating C) with only a reduction in mating frequency (ca.  
202 20-fold). This result provides the first evidence of ICE complementation by neighboring cells  
203 and suggests that CDS14 lipoprotein may initiate ICEA transfer in *M. agalactiae* by promoting  
204 a contact between the donor and the recipient cells.

205 Interestingly, global alignment of CDS14 lipoprotein with its homologs found in ICEB, the  
206 conjugative element occurring in the closely related *M. bovis* species, revealed 86.9% of  
207 sequence similarity (Fig. S2). To test whether these differences may influence the

208 conjugative transfer of ICEA in *M. agalactiae*, PG2<sup>E</sup>[ICEA *cds14*::mTn]<sup>G</sup>28 was transformed  
209 with plasmid pO/T-CDS14bov expressing the ICEB CDS14 lipoprotein. This plasmid was able  
210 to restore the conjugative properties of *cds14* knock-out ICEA with a 2-fold reduction in  
211 mating frequency (Table 1, mating D). This suggests that one of the CDS14 functions is  
212 conserved between ICEA and ICEB.

213 Altogether these results unveiled the critical role played by ICE encoded surface lipoproteins  
214 in the exchange of genetic information within mycoplasma species and most likely across  
215 species.

216 **CDS5 expression from co-resident ICEAs is a key factor for *cds5* knock-out ICEA**  
217 **complementation.** In contrast to *cds14* mutants that can be complemented by co-resident  
218 ICEAs, or even by neighboring cells expressing CDS14, a large number of mutant ICEAs were  
219 unable to disseminate from 5632 to PG2 (Fig. 2 and Table S2). Several of these mutant ICEAs  
220 were knocked-out in genes whose products were not detected by proteomics (see below)  
221 raising the question of whether the level of gene expression in co-resident ICEAs can  
222 influence their cooperative behavior. To address this issue, complementation studies were  
223 performed using plasmid DNA constructs expressing either CDS5 or CDS22, two proteins  
224 suspected to be involved in very distinct steps of ICE transfer.

225 While *cds5* knock-out ICEAs have lost their capacity to disseminate from 5632 to PG2 (Fig.  
226 2D, mutants 11 and 12), mating of 5632 complemented with *cds5* (plasmid pO/T-CDS5) with  
227 ICEA-negative PG2 recipient cells resulted in a ca. 10-fold increase in mating frequency  
228 (Table 1, matings E and G). Analysis of the mating progeny revealed that 64 to 78% of these  
229 transconjugants displayed a PG2 genomic profile, indicating the conjugative transfer of the  
230 *cds5* knock-out ICEA from 5632 to PG2. Transformation with the empty vector (plasmid

231 pO/T) as negative control resulted in no detectable event of transfer (Table 1, matings F and  
232 H). These data showed that *cds5* knock-out ICEAs can be complemented *in trans*, at least  
233 partially, when *cds5* is expressed from the expression vector, while paradoxically co-resident  
234 ICEAs were unable to restore the conjugative properties of *cds5* knock-out ICEAs. Finally,  
235 these complementation studies allowed us to rule out any lethal effect resulting from *cds5*  
236 knock-out ICEAs integration in the PG2 chromosome.

237 The CDS5 is a putative membrane bound hexamer with an ATPase activity displaying some  
238 similarity with the TraG/VirD4 conjugative channel component found in more classical  
239 bacteria (3). The formation of a hexameric structure by *cds5* products remains to be  
240 confirmed, but this multimeric organization may provide an alternative scenario for the  
241 inactive *cds5* knock-out ICEAs in 5632. Indeed, mTn insertion in *cds5* could lead to the  
242 expression of truncated products interfering with the hexamer complex formation, and thus  
243 inducing a negative dominant effect on co-resident ICEAs. To address this issue, truncated  
244 versions of *cds5* were cloned into the pO/T expression vector leading to plasmids pO/T-CDS5  
245 N1, N2, C1, and C2, expressing respectively CDS5 N- and C-terminal regions resulting from  
246 mTn insertion in *cds5* mutants 11 and 12 (Fig. S3). Transformation of 5632[ICEA  
247 *ncr19/E::mTn*]<sup>G</sup>23 (mTn inserted in *ncr19/E* with no influence on conjugation) with  
248 constructions carrying truncated forms of *cds5*, the full-length *cds5* or the empty vector had  
249 no influence on mating efficacy (Table 1, matings I to N), indicating that the expression of  
250 CDS5 truncated products did not inhibit ICEA transfer, and that the conjugative-deficient  
251 phenotype of *cds5* knock-out mutants is not the result of a negative dominant effect.

252 **CDS22 expression is unable to *trans*-complement *cds22* knock-out ICEAs.** A second series of  
253 complementation studies were performed with the *cds22* knock-out ICEA mutant 5632[ICEA

254 *cds22::mTn*<sup>G</sup>50. This gene encodes a DDE recombinase that was previously shown to  
255 mediate ICEA excision and circularization (7). Transformation with pO/T-CDS22 did not  
256 increase mating frequency when compared to the empty vector, and no PG2 transconjugants  
257 were identified upon analysis of the mating progeny (Table 1, matings O and P).  
258 Transformation of 5632[ICEA *ncr19/E::mTn*<sup>G</sup>23 (mTn inserted in *ncr19/E* with no influence  
259 on conjugation) with pO/T-CDS22 or the empty vector had no or minimal influence on the  
260 mating frequencies (Table 1, matings Q and M). These results suggest that the *cds22* knock-  
261 out ICEA cannot be complemented *in trans*, neither by co-resident ICEAs nor by a CDS22  
262 expressing plasmid. This result is consistent with the longstanding observation that DDE  
263 transposases show a *cis*-preference for their activities (20–22).

264 Altogether these results illustrate the complex interactions taking place among co-resident  
265 ICEAs in 5632, and elucidated some of the mechanisms underlying their non-cooperative  
266 behavior.

267 **Protein expression profiles of PG2-ICEA mutants.** A previous study has shown that in 5632  
268 three ICEA products are detectable by proteomic analysis under laboratory conditions:  
269 CDS14, and to a lower extent CDS17 and CDS30 (16). To further characterize ICEA expression  
270 in different genomic contexts, a proteomic analysis was conducted using a set of PG2  
271 transconjugants having acquired a mutated ICEA copy from 5632 (Fig. 3C and Table S4). Data  
272 revealed that up to 9 ICEA products, namely CDSs C, D, 7, 15, 19, E, 14, F, and 30, were  
273 detected in PG2<sup>T</sup>[ICEA *ncr19/E::mTn*<sup>G</sup>23 (mTn inserted in *ncr19/E* with no influence on  
274 conjugation). CDS17 was also detected in PG2<sup>T</sup>[ICEA *ncr19/E::mTn*<sup>G</sup>23 but below cut-off  
275 values. CDSE, CDS14 and CDSF were not detected in PG2<sup>T</sup>[ICEA *cdsE::mTn*<sup>G</sup>25, PG2<sup>T</sup>[ICEA  
276 *cds14::mTn*<sup>G</sup>28 or PG2<sup>T</sup>[ICEA *cdsF::mTn*<sup>G</sup>35, in which the corresponding genes are

277 disrupted. Besides confirming the disruption of these genes, these data also indicate that  
278 mTn insertion in *cdsE* has no polar effect on the expression of the downstream *cds14*.  
279 Interestingly, the data suggested that some ICEA loci might be downregulated to  
280 undetectable levels in the conjugative-deficient PG2<sup>T</sup>[ICEA *cds14*::mTn]<sup>G28</sup>. These  
281 corresponded to CDSC, CDS4, CDS7 and CDS19 detected in other mutants, whose genes are  
282 located upstream of *cds14*. Overall, PG2 ICEA mutants that were tested here and disrupted  
283 in identified coding genes, versus *ncr19/E*, had a simplified ICEA protein expression profile.

## 284 **DISCUSSION**

285 Since their discovery in mycoplasma species of the Hominis phylogenetic group, MICEs have  
286 been found broadly distributed across Mollicutes (2–6, 8) and their pivotal role in HGTs is  
287 emerging (7, 12, 13). Taking advantage of the *M. agalactiae* ICE prototype, this study  
288 provides the first functional analysis of MICE factors involved in conjugative transfer.  
289 Because MICEs, such as ICEA, are often found in multiple copies, this study points toward  
290 their complex interplay in the mycoplasma host-environment.

### 291 **The functional ICEA backbone**

292 The minimal ICEA chassis conferring conjugative properties to *M. agalactiae* was identified  
293 by random transposon mutagenesis. Of the 23 genes reported in ICEA, 17 were found  
294 disrupted by the insertion of a mTn and 13 were found essential for self-dissemination, since  
295 a single mTn insertion in any of these regions abrogated the conjugative properties of *M.*  
296 *agalactiae*. These data point towards the minimal ICEA machinery being composed of (i) a  
297 cluster of 7 proteins with predicted transmembrane domains that most likely represents a  
298 module associated with the conjugative channel (CDS5 to CDS19), (ii) a surface exposed  
299 lipoprotein (CDS14), (iii) a putative partitioning protein (CDSG), (iv) a DDE transposase

300 (CDS22), and (v) several other proteins with no predicted function (CDS1, CDSA, CDSC, and  
301 CDS30). The conjugative-deficient phenotype of the ICEA mutants is unlikely to be result of a  
302 polar effect since (i) mTn insertions were identified at close proximity to essential ICEA  
303 regions with no influence on conjugation (*cds1*, *cds14*, *cds30*, and to a lesser extent *cdsA* and  
304 *cdsG*), (ii) *cds14* knock-out ICEAs can be complemented *in trans*, (iii) ICEA-mutants having the  
305 putative channel module disrupted by a mTn inserted in *cds5* can be plasmid-  
306 complemented, and (iv) mTn insertions in the *cdsE-cdsH* region have no influence on protein  
307 expression from surrounding genes. Whether additional essential ICEA functions may be  
308 encoded by several of the 6 short genes (0.20 to 0.65 kb) with no mTn insertion remains to  
309 be further investigated.

310 The minimal ICEA chassis was consistent with the conservation of *cds5*, *cds17*, *cds19* and  
311 *cds22* across documented ICEs of ruminant mycoplasma species (8), and the occurrence of  
312 *cds1*, *cds14* and *cds16* at very similar location in a majority of MICEs (2, 4–6, 23).  
313 Interestingly, the conjugative properties of *M. agalactiae* were also abrogated by mTn  
314 insertion in NCRs raising questions regarding the presence of regulatory elements and/or key  
315 motifs, such as an *oriT*, in these regions. The occurrence of such sequences in the NCR1/A  
316 (1238 nucleotides) is supported by the identification of a hairpin motif (TGGCTCAT-N<sub>5</sub>-  
317 ATGAGCCA) at positions 2046 to 2066 (S. Torres-Puig, personal communication). Whether  
318 mTn insertion in NCRs may influence the expression surrounding ICEA regions is unknown.

319 Accessory ICEA functions were only found associated with 4 genes, namely *cds11*, *cdsE*, *cdsF*  
320 and *cdsH*. These accessory functions are all encoded within a 6.4-kb ICEA region spanning  
321 *cdsE* to *cdsH*, with the exception of *cds11* that belongs to a cluster of 6 genes (*cdsA* to *cdsD*)  
322 located upstream the putative channel module (Fig. 1). Although dispensable, an important

323 reduction of the mating frequency was observed for several mutants having a mTn inserted  
324 in these ICEA regions (Fig. 2C). For PG2<sup>T</sup>[ICEA *cds11*::mTn]<sup>G7</sup> (Fig. 2A, mutant 7), this  
325 reduction was not influenced by the position of the mutant ICEA in the PG2 chromosome.  
326 Finally, Blastp analyses with CDSE revealed a significant similarity ( $\geq 90\%$ ) to a putative  
327 prophage gene product found in the chromosome of PG2 (MAG6440) and 5632  
328 (MAGa7400). The presence of this chromosomal *cdsE* homolog is puzzling and its role in ICEA  
329 transfer remains to be confirmed.

### 330 **A minimal genome but coping with multiple ICEA copies**

331 Unlike classical ICEs, ICEA has no preferential insertion specificity and multiple copies can be  
332 found at different loci of the host chromosome. This raised questions regarding their  
333 maintenance in the small mycoplasma genomes and the deleterious effect that can be  
334 associated with their random insertion, in particular because they were found within coding  
335 sequences (7, 16). Whether ICEA may confer any advantage *in vivo* is unknown, but PG2 ICEA  
336 transconjugants displayed a reduced fitness in laboratory conditions (unpublished data).  
337 Many bacterial ICEs and some prokaryotic transposable elements carry cargo genes  
338 implicated in accessory functions, such as antibiotic resistance, which confer a selective  
339 advantage to their host (1). Such cargo genes have never been reported in MICEs, but ICE  
340 mediated CTs are likely contributing to the acquisition of new phenotypic traits upon  
341 chromosomal exchanges.

### 342 **Backup functions associated with co-resident ICEAs**

343 Our data suggest that co-resident ICEAs are able to cooperate by complementing essential  
344 functions in mutant ICEAs. This was shown by using *cds14* knock-out ICEAs, which can self-  
345 disseminate when occurring in the context of 5632, but not in PG2 that contains no

346 additional ICEA copy. The complementation of *cds14* by co-resident ICEAs was further  
347 confirmed by the constitutive expression of the CDS14 lipoprotein in 5632 mutants having  
348 one of the 3 ICEA copy knocked-out in *cds14*, but not in PG2 cells having acquired a *cds14*  
349 knock-out ICEA. Remarkably, this cooperative behavior was found to extend to neighboring  
350 cells, since transformants of ICEA-negative cells containing a plasmid vector expressing  
351 CDS14 were able to complement *cds14* knock-out ICEAs in neighboring cells. Besides  
352 providing the first example of ICE complementation by neighboring cells, this result has deep  
353 implications for the dissemination of MICEs within and across mycoplasma species. This was  
354 further supported by complementation studies showing that the CDS14 lipoprotein in *M.*  
355 *agalactiae* can be substituted by its homolog in *M. bovis* ICEB, and our previous study  
356 showing ICEA mediated CTs between *M. agalactiae* and *M. bovis* (12) .

357 Interestingly, the cooperative behavior documented with *cds14* knock-out ICEAs did not  
358 extend to other critical ICEA regions. Complementation studies with *cds22* knock-out ICEAs  
359 confirmed that several critical ICEA functions can be associated with *cis*-acting elements that  
360 cannot be complemented by co-resident ICEAs. However, studies with *cds5* mutant ICEAs  
361 suggested that interactions among co-resident ICEAs can be more complex. Indeed, *cds5*  
362 knock-out ICEAs can be *trans*-complemented upon transformation with a CDS5 expressing  
363 plasmid but not by co-resident ICEAs. Since ICEA transfer from 5632 to PG2 occurs only at  
364 low frequency, ICEA activation is expected to be a rare event. It is thus reasonable to  
365 speculate that only one of the three chromosomal ICEA copies in 5632 can be stochastically  
366 activated. This hypothesis provides a simple scenario to understand the lack of  
367 complementation of *cds5* mutants by co-resident ICEAs, since this component of the mating  
368 channel is expected to be only expressed upon ICEA activation. It is further supported by



369 proteomic analysis showing a simplified ICEA protein expression profile that contrasted with  
370 the constitutive expression of the CDS14 surface lipoprotein.

### 371 **Conclusions**

372 The results generated in the present study were combined with current knowledge to  
373 propose the first working model of horizontal ICE dissemination in mycoplasmas, including  
374 cooperation among co-resident ICEs (Fig. 4). These data, together with the large collection of  
375 ICEA-mutants generated in this study, pave the way for future studies aiming at deciphering  
376 ICE-mediated CTs within and among mycoplasma species. These simple organisms also  
377 provide a valuable experimental frame to decipher the mechanisms of DNA exchange in  
378 more complex bacteria when associated with this new category of mobile elements.

### 379 **MATERIALS AND METHODS**

380 **Mycoplasmas and culture conditions.** *M. agalactiae* strains PG2 and 5632 have been  
381 previously described (14, 16), and the sequence of each genome is available in databases  
382 (GenBank reference sequences CU179680.1 and FP671138.1, respectively). These two  
383 strains differs in their ICE content with strain 5632 having three almost identical  
384 chromosomal copies of ICEA (ICEA-I, -II, and -III), while strain PG2 contains only a severely  
385 degenerated, vestigial ICE (14, 16). *M. agalactiae* was grown at 37 °C in SP4 medium  
386 supplemented with 500 µg/ml cephalexin (Virbac). When needed, gentamicin (50 µg/ml),  
387 tetracycline (2 µg/ml) or puromycin (10 µg/ml), was added to the medium, alone or in  
388 combination. Due to their small cell- and colony-size, mycoplasma growth cannot be  
389 monitored by optical density. Mycoplasma titers were thus determined based on colonies  
390 counts on solid media after 4 to 7 days of incubation at 37° C, using a binocular stereoscopic  
391 microscope (19).

392 **Transposon mutagenesis and genetic tagging of mycoplasmas with antibiotic markers.** A  
393 similar approach was used for transposon mutagenesis and genetic tagging of *M. agalactiae*.  
394 Selective antibiotic markers were introduced randomly in the mycoplasma genome as  
395 previously described by transforming mycoplasma cultures with the plasmid pMT85 or its  
396 derivatives (7, 19, 24). The pMT85 carries a mini-transposon (mTn) derived from the  
397 gentamicin resistance Tn4001. The transposase gene (*tnpA*) is located outside of the mTn to  
398 prevent re-excision events once it is inserted in the host chromosome (19). Two derivatives,  
399 pMT85-Tet and pMT85-Pur, were constructed as previously described by replacing the  
400 gentamicin resistance gene with a tetracycline or a puromycin resistance marker,  
401 respectively (7).

402 **PCR-based screening of mycoplasma mutant library.** A set of 19 oligonucleotides spanning  
403 the whole ICEA region (Table S5) was used to develop a PCR-based screening of the mutant  
404 library and identify 5632 mutants having a mTn inserted within ICEA regions. Each ICEA  
405 specific primer was used in combination with the transposon-specific oligonucleotide SG5  
406 priming at both inverted repeats (IRs) that define the extremities of the integrated  
407 transposon (Table S5). PCR amplifications were performed according to the  
408 recommendations of the Taq DNA polymerase supplier (New England Biolabs). For each  
409 mutant, the position of the mTn insertion in the *M. agalactiae* chromosome was determined  
410 by sequencing the junction between *M. agalactiae* genomic DNA and the 5'- or 3'-end of the  
411 transposon using oligonucleotides SG6\_3pMT85E (specific to the 5'-end of the Gm-tagged  
412 version of the mTn), SG9pMM21-7mod (specific to the 5'-end of the Tet-tagged version of  
413 the mTn) or EB8 (specific to the 3'-end of all mTn constructions) as primers (Table S5).  
414 Genomic DNA sequencing was performed at the Genomic platform GeT-Purpan (Toulouse,

415 France). The distribution of mTn insertions among the three ICEA copies was determined by  
416 long-range PCR amplifications (Expand Long Template PCR System; Roche Life Science) using  
417 mTn specific primers and a panel of oligonucleotides corresponding to genomic DNA regions  
418 surrounding each ICEA locus (Table S5).

419 **Mycoplasma mating experiments and genetic characterization of transconjugant**  
420 **progenies.** Mating experiments were conducted as described previously by co-incubation of  
421 ICE-positive and ICE-negative cells (7). Mycoplasma growth may considerably vary from  
422 batch to batch when using the rich SP4 that contains serum and yeast extract. To reduce  
423 potential bias in mating frequencies observed in between experiments, a single batch of  
424 medium was used in this study. Cultures of donor and recipient mycoplasmas ( $10^9$  CFUs)  
425 were mixed in a 1:1 ratio (matings PG2 ICEA x PG2) or a 1:10 ratio (matings 5632 x PG2) to  
426 increase the chances of recovering PG2 ICEA transconjugants. The mating frequency was  
427 calculated by dividing the number of double-resistant colonies obtained on selective solid  
428 media by the number of mycoplasma colonies obtained on non-selective media. *M.*  
429 *agalactiae* transconjugants were characterized by PCR amplification using genomic DNA  
430 prepared from individual colonies (7). Presence of antibiotic resistance genes and ICEA in  
431 transconjugants was confirmed by using specific oligonucleotides (Table S5). The nature of  
432 the genetic backbone was addressed by using a set of primers pairs that covers the *M.*  
433 *agalactiae* genome and produces PCR fragments specific to 5632 or PG2 (Table S5), as  
434 previously described (7, 12).

435 **DNA constructs for protein expression in mycoplasmas.** Protein expression in *M. agalactiae*  
436 was performed as previously described by using the plasmid p20-1miniO/T (designated in  
437 the present study as pO/T) (19, 25). Briefly, mycoplasma coding sequences were cloned

438 downstream of the lipoprotein P40 gene (MAG2410) promoter region. These two regions  
439 were assembled by PCR amplification using overlapping primers (Table S5). The resulting PCR  
440 product was cloned into pGEM-T Easy (Promega) before subcloning at the *NotI* site of the  
441 pO/T. PCRs were performed using the Phusion high-fidelity DNA polymerase (New England  
442 Biolabs). DNA constructions were verified by DNA sequencing and introduced in *M.*  
443 *agalactiae* by transformation, as previously described (19).

444 **Proteomic analyses and immunodetection of ICEA products.** *M. agalactiae* grown under  
445 normal and mating growth conditions were subjected to proteomic analyses. Cells were  
446 collected by centrifugation of mycoplasma cultures (8,000 x *g*), washed and resuspended in  
447 Dulbecco's phosphate-buffered saline (DPBS). Proteins were separated by 1D SDS-PAGE and  
448 gel sections were subjected to trypsin digestion. Peptides were further analyzed by nano  
449 liquid chromatography coupled to a nanospray Q-Exactive hybrid quadrupole-Orbitrap mass  
450 spectrometer (Thermo Scientific). Peptides were identified as previously described by using  
451 a database consisting of *M. agalactiae* strain 5632 entries (26). ICEA products were detected  
452 by specific anti-sera on Western and colony blots (25, 27). Triton-X114 soluble proteins were  
453 extracted from *M. agalactiae* as previously described (28). The anti-CDS14 lipoprotein rabbit  
454 serum was produced by animal immunization with a recombinant CDS14 protein (pMAL™  
455 Protein Fusion and Purification System; New England Biolabs). A sheep serum raised against  
456 the *M. agalactiae* surface antigen P80 was used as a control (25). Western and colony blots  
457 were developed by using swine anti-rabbit or rabbit anti-sheep immunoglobulin G  
458 conjugated to horseradish peroxidase (DAKO) and the 4-chloro-naphthol substrate or the  
459 SuperSignal West Dura Extended Duration Substrate (Thermo Scientific).

460 **SUPPLEMENTAL MATERIAL**

461 **Table S1.** Relevant features of ICEA products.

462 **Table S2.** Mutant ICEAs generated in *M. agalactiae* strain 5632.

463 **Table S3.** Mating frequencies per single-resistant CFUs.

464 **Table S4.** Proteomic analysis of PG2 ICEA mutants.

465 **Table S5.** Oligonucleotides used in the present study.

466 **Figure S1.** Mutant ICEAs selected in PG2 occur as a single ICEA copy randomly integrated in  
467 the host chromosome.

468 **Figure S2.** Global alignment of CDS14 lipoproteins found in ICEs of *M. agalactiae* strain 5632  
469 and *M. bovis* strain PG45.

470 **Figure S3.** Plasmid constructions carrying *cds5* or truncated versions of *cds5*.

#### 471 **ACKNOWLEDGMENTS**

472 This work was supported by grant ANR09MIE016 (MycXgene) from the French national  
473 funding research agency (ANR) and financial supports from INRA and ENVIT. We thank  
474 Richard Herrmann and Sebastien Guiral for providing pMT85 and pMT85-Tet plasmid  
475 constructions. We also thank Philippe Giammarinaro for his help in producing the anti-P80  
476 sheep serum, as well as Emilie Houssin and Abdel Touré for excellent technical assistance.  
477 Finally, we also thank Oscar Q Pich and Sergi Torres-Puig for helpful discussions.

#### 478 **REFERENCES**

- 479 1. **Johnson CM, Grossman AD.** 2015. Integrative and Conjugative Elements (ICEs): what  
480 they do and how they work. *Annu Rev Genet* **49**:577–601.
- 481 2. **Calcutt MJ, Lewis MS, Wise KS.** 2002. Molecular genetic analysis of ICEF, an integrative  
482 conjugal element that is present as a repetitive sequence in the chromosome of  
483 *Mycoplasma fermentans* PG18. *J Bacteriol* **184**:6929–6941.

- 484 3. **Marenda M, Barbe V, Gourgues G, Mangenot S, Sagne E, Citti C.** 2006. A new  
485 integrative conjugative element occurs in *Mycoplasma agalactiae* as chromosomal and  
486 free circular forms. *J Bacteriol* **188**:4137–4141.
- 487 4. **Pinto PM, Carvalho, MO, Alves-Junior, L, Brocchi, M, Schrank, IS.** 2007. Molecular  
488 analysis of an integrative conjugative element, ICEH, present in the chromosome of  
489 different strains of *Mycoplasma hyopneumoniae*. *Genet Mol Biol* **30**:256–263.
- 490 5. **Wise KS, Calcutt MJ, Foeking MF, Röske K, Madupu R, Methé BA.** 2011. Complete  
491 genome sequence of *Mycoplasma bovis* type strain PG45 (ATCC 25523). *Infect Immun*  
492 **79**:982–983.
- 493 6. **Thiaucourt F, Manso-Silvan L, Salah W, Barbe V, Vacherie B, Jacob D, Breton M, Dupuy  
494 V, Lomenech AM, Blanchard A, Sirand-Pugnet P.** 2011. *Mycoplasma mycoides*, from  
495 “mycoides Small Colony” to “capri”. A microevolutionary perspective. *BMC Genomics*  
496 **12**:114.
- 497 7. **Dordet-Frisoni E, Marenda MS, Sagné E, Nouvel LX, Guérillot R, Glaser P, Blanchard A,  
498 Tardy F, Sirand-Pugnet P, Baranowski E, Citti C.** 2013. ICEA of *Mycoplasma agalactiae*: a  
499 new family of self-transmissible integrative elements that confers conjugative properties  
500 to the recipient strain. *Mol Microbiol* **89**:1226–1239.
- 501 8. **Tardy F, Mick V, Dordet-Frisoni E, Marenda M, Sirand-Pugnet P, Blanchard A, Citti C.**  
502 2014. Integrative conjugative elements (ICEs) are widespread in field isolates of  
503 *Mycoplasma* species pathogenic for ruminants. *Appl Environ Microbiol* **81**:1634-1643.
- 504 9. **Razin S, Yogev D, Naot Y.** 1998. Molecular biology and pathogenicity of mycoplasmas.  
505 *Microbiol Mol Biol Rev* **62**:1094–1156.

- 506 10. **Citti C, Blanchard A.** 2013. Mycoplasmas and their host: emerging and re-emerging  
507 minimal pathogens. *Trends Microbiol* **21**:196–203.
- 508 11. **Woese CR, Maniloff J, Zablen LB.** 1980. Phylogenetic analysis of the mycoplasmas. *Proc*  
509 *Natl Acad Sci USA* **77**:494–498.
- 510 12. **Dordet-Frisoni E, Sagné E, Baranowski E, Breton M, Nouvel LX, Blanchard A, Marendra**  
511 **MS, Tardy F, Sirand-Pugnet P, Citti C.** 2014. Chromosomal transfers in mycoplasmas:  
512 when minimal genomes go mobile. *MBio* **5**:e01958.
- 513 13. **Citti C, Dordet-Frisoni E, Nouvel LX, Kuo CH, Baranowski E.** 2018. Horizontal gene  
514 transfers in mycoplasmas (Mollicutes). *Curr Issues Mol Biol* **29**:3–22.
- 515 14. **Sirand-Pugnet P, Lartigue C, Marendra M, Jacob D, Barré A, Barbe V, Schenowitz C,**  
516 **Mangenot S, Couloux A, Segurens B, de Daruvar A, Blanchard A, Citti C.** 2007. Being  
517 pathogenic, plastic, and sexual while living with a nearly minimal bacterial genome.  
518 *PLOS Genet* **3**:e75.
- 519 15. **Gray TA, Krywy JA, Harold J, Palumbo MJ, Derbyshire KM.** 2013. Distributive conjugal  
520 transfer in mycobacteria generates progeny with meiotic-like genome-wide mosaicism,  
521 allowing mapping of a mating identity locus. *PLOS Biol* **11**:e1001602.
- 522 16. **Nouvel LX, Sirand-Pugnet P, Marendra MS, Sagné E, Barbe V, Mangenot S, Schenowitz**  
523 **C, Jacob D, Barré A, Claverol S, Blanchard A, Citti C.** 2010. Comparative genomic and  
524 proteomic analyses of two *Mycoplasma agalactiae* strains: clues to the macro- and  
525 micro-events that are shaping mycoplasma diversity. *BMC Genomics* **11**:86.
- 526 17. **Guérrillot R, Siguier P, Goubeyre E, Chandler M, Glaser P.** 2014. The diversity of  
527 prokaryotic DDE transposases of the mutator superfamily, insertion specificity, and  
528 association with conjugation machineries. *Genome Biol Evol* **6**:260–272.

- 529 18. **Alvarez-Martinez CE, Christie PJ.** 2009. Biological diversity of prokaryotic type IV  
530 secretion systems. *Microbiol Mol Biol Rev* **73**:775–808.
- 531 19. **Baranowski E, Guiral S, Sagné E, Skapski A, Citti C.** 2010. Critical role of dispensable  
532 genes in *Mycoplasma agalactiae* interaction with mammalian cells. *Infect Immun*  
533 **78**:1542–1551.
- 534 20. **Nagy Z, Chandler M.** 2004. Regulation of transposition in bacteria. *Res Microbiol*  
535 **155**:387–398.
- 536 21. **Chandler M, Fayet O, Rousseau P, Ton Hoang B, Duval-Valentin G.** 2015. Copy-out-  
537 paste-in transposition of IS911: a major transposition pathway. *Microbiol Spectr*  
538 **3**:MDNA3-0031-2014.
- 539 22. **Duval-Valentin G, Chandler M.** 2011. Cotranslational control of DNA transposition: a  
540 window of opportunity. *Mol Cell* **44**:989–996.
- 541 23. **Shu H-W, Liu T-T, Chan H-I, Liu Y-M, Wu K-M, Shu H-Y, Tsai S-F, Hsiao K-J, Hu WS, Ng**  
542 **WV.** 2012. Complexity of the *Mycoplasma fermentans* M64 genome and metabolic  
543 essentiality and diversity among mycoplasmas. *PLOS One* **7**:e32940.
- 544 24. **Zimmerman C-U, Herrmann R.** 2005. Synthesis of a small, cysteine-rich, 29 amino acids  
545 long peptide in *Mycoplasma pneumoniae*. *FEMS Microbiol Lett* **253**:315–321.
- 546 25. **Skapski A, Hygonenq M-C, Sagné E, Guiral S, Citti C, Baranowski E.** 2011. Genome-scale  
547 analysis of *Mycoplasma agalactiae* loci involved in interaction with host cells. *PLOS One*  
548 **6**:e25291.
- 549 26. **Crouzet M, Claverol S, Lomenech A-M, Sénéchal CL, Costaglioli P, Barthe C, Garbay B,**  
550 **Bonneu M, Vilain S.** 2017. *Pseudomonas aeruginosa* cells attached to a surface display a  
551 typical proteome early as 20 minutes of incubation. *PLOS One* **12**:e0180341.



- 552 27. **Nouvel L-X, Marenda M, Sirand-Pugnet P, Sagné E, Glew M, Mangenot S, Barbe V,**  
553 **Barré A, Claverol S, Citti C.** 2009. Occurrence, plasticity, and evolution of the *vpma* gene  
554 family, a genetic system devoted to high-frequency surface variation in *Mycoplasma*  
555 *agalactiae*. *J Bacteriol* **191**:4111–4121.
- 556 28. **Baranowski E, Bergonier D, Sagné E, Hygonenq M-C, Ronsin P, Berthelot X, Citti C.**  
557 2014. Experimental infections with *Mycoplasma agalactiae* identify key factors involved  
558 in host-colonization. *PLOS One* **9**:e93970.
- 559  
560

561

TABLES

562

**Table 1.** Complementation studies with *cds14*, *cds5*, and *cds22* knock-out ICEAs.

| Mating <sup>a</sup>                                    | ICE donor <sup>b</sup>                                                                  | ICE recipient <sup>c</sup>    | Mating frequency (x 10 <sup>-8</sup> ) <sup>d</sup> | Genomic profile of the mating progeny <sup>e</sup> |      |
|--------------------------------------------------------|-----------------------------------------------------------------------------------------|-------------------------------|-----------------------------------------------------|----------------------------------------------------|------|
|                                                        |                                                                                         |                               |                                                     | PG2                                                | 5632 |
| <b>Complementation of <i>cds14</i> knock-out ICEAs</b> |                                                                                         |                               |                                                     |                                                    |      |
| A                                                      | PG2 <sup>E</sup> [ICEA <i>cds14</i> ::mTn] <sup>G</sup> 28 + pO/T-CDS14                 | PG2 <sup>P</sup> + pO/T       | 170 ± 80                                            | n.a.                                               | n.a. |
| B                                                      | PG2 <sup>E</sup> [ICEA <i>cds14</i> ::mTn] <sup>G</sup> 28 + pO/T                       | PG2 <sup>P</sup> + pO/T       | 0 <sup>f</sup>                                      | n.a.                                               | n.a. |
| C                                                      | PG2 <sup>E</sup> [ICEA <i>cds14</i> ::mTn] <sup>G</sup> 28 + pO/T                       | PG2 <sup>P</sup> + pO/T-CDS14 | 8.4 ± 6.3                                           | n.a.                                               | n.a. |
| D                                                      | PG2 <sup>E</sup> [ICEA <i>cds14</i> ::mTn] <sup>G</sup> 28 + pO/T-CDS14bov <sup>g</sup> | PG2 <sup>P</sup> + pO/T       | 89                                                  | n.a.                                               | n.a. |
| <b>Complementation of <i>cds5</i> knock-out ICEAs</b>  |                                                                                         |                               |                                                     |                                                    |      |
| E                                                      | 5632[ICEA <i>cds5</i> ::mTn] <sup>G</sup> 11 + pO/T-CDS5                                | PG2 <sup>P</sup> + pO/T       | 1                                                   | 7                                                  | 2    |
| F                                                      | 5632[ICEA <i>cds5</i> ::mTn] <sup>G</sup> 11 + pO/T                                     | PG2 <sup>P</sup> + pO/T       | 0                                                   | n.a.                                               | n.a. |
| G                                                      | 5632[ICEA <i>cds5</i> ::mTn] <sup>G</sup> 12 + pO/T-CDS5                                | PG2 <sup>P</sup> + pO/T       | 1                                                   | 14                                                 | 8    |
| H                                                      | 5632[ICEA <i>cds5</i> ::mTn] <sup>G</sup> 12 + pO/T                                     | PG2 <sup>P</sup> + pO/T       | 0                                                   | n.a.                                               | n.a. |
| <b>Expression of CDS5 truncated products</b>           |                                                                                         |                               |                                                     |                                                    |      |
| I                                                      | 5632[ICEA <i>ncr19/E</i> ::mTn] <sup>G</sup> 23 + pO/T-CDS5N1                           | PG2 <sup>P</sup> + pO/T       | 110                                                 | n.d.                                               | n.d. |
| J                                                      | 5632[ICEA <i>ncr19/E</i> ::mTn] <sup>G</sup> 23 + pO/T-CDS5C1                           | PG2 <sup>P</sup> + pO/T       | 210                                                 | n.d.                                               | n.d. |
| K                                                      | 5632[ICEA <i>ncr19/E</i> ::mTn] <sup>G</sup> 23 + pO/T-CDS5N2                           | PG2 <sup>P</sup> + pO/T       | 130                                                 | n.d.                                               | n.d. |
| L                                                      | 5632[ICEA <i>ncr19/E</i> ::mTn] <sup>G</sup> 23 + pO/T-CDS5C2                           | PG2 <sup>P</sup> + pO/T       | 180                                                 | n.d.                                               | n.d. |
| M                                                      | 5632[ICEA <i>ncr19/E</i> ::mTn] <sup>G</sup> 23 + pO/T                                  | PG2 <sup>P</sup> + pO/T       | 110                                                 | n.d.                                               | n.d. |
| N                                                      | 5632[ICEA <i>ncr19/E</i> ::mTn] <sup>G</sup> 23 + pO/T-CDS5                             | PG2 <sup>P</sup> + pO/T       | 170                                                 | n.d.                                               | n.d. |
| <b>Complementation of <i>cds22</i> knock-out ICEAs</b> |                                                                                         |                               |                                                     |                                                    |      |
| O                                                      | 5632[ICEA <i>cds22</i> ::mTn] <sup>G</sup> 50 + pO/T-CDS22                              | PG2 <sup>P</sup> + pO/T       | 4                                                   | 0                                                  | 5    |
| P                                                      | 5632[ICEA <i>cds22</i> ::mTn] <sup>G</sup> 50 + pO/T                                    | PG2 <sup>P</sup> + pO/T       | 2                                                   | 0                                                  | 5    |
| Q                                                      | 5632[ICEA <i>ncr19/E</i> ::mTn] <sup>G</sup> 23 + pO/T-CDS22                            | PG2 <sup>P</sup> + pO/T       | 40                                                  | 1                                                  | 1    |

563

<sup>a</sup> Mating experiments were performed with single clones grown and co-incubated in

564

SP4-medium containing tetracycline (2 µg/ml). <sup>b</sup> PG2 ICE donors were generated upon

565

mating with individual 5632 mutants and a PG2 clone carrying an enrofloxacin

566

resistance-tag (E); the mutant number refers to mutant ICEAs (gentamicin tagged; G)

567

generated in 5632 by mTn mutagenesis or designates mutant ICEAs selected in PG2

568

upon mating with 5632 (Fig. 2 and Table S2); plasmid constructions used for the

569

complementation are indicated; the ICE donor in mating A to D differs from Dordet-

570

Frisoni *et al.*, 2013 (7) by the site of ICEA integration in the chromosome of PG2

571

(chromosomal position 135303 and 337636, respectively). <sup>c</sup> The PG2 recipient cells

572

were labeled with a mTn encoding resistance to puromycin (P) and transformed with

573

the empty vector (pO/T) or the vector expressing CDS14 (pO/T-CDS14). <sup>d</sup> The values

574 shown are the means  $\pm$  standard deviation when the number of independent assays  
575 was  $\geq 3$ , or the average of two independent assays; dual-resistant colonies were  
576 selected by using a combination of gentamicin and puromycin; mating frequencies per  
577 single-resistant CFUs are provided in Table S3. <sup>e</sup> Double-resistant colonies were  
578 genetically characterized to differentiate PG2-transconjugants from 5632-  
579 transconjugants that have acquired PG2 genomic materials by CTs (see Materials and  
580 Methods); the number of clones with a PG2 or 5632 genomic profile is indicated; n.a. :  
581 not applicable; n.d. : not determined. <sup>f</sup> Selection of false positive transconjugants  
582 (lacking one or the other resistance marker) with a frequency  $< 10^{-9}$  (detection limit:  $1$   
583  $\times 10^{-10}$ ). <sup>g</sup> PG2<sup>E</sup>[ICEA *cds14*::mTn]<sup>G</sup>28 was transformed with the plasmid pO/T-  
584 CDS14bov expressing the *M. bovis* PG45 homolog of CDS14 (MBOVPG45\_0187).

585

586

#### FIGURE LEGENDS

587 **FIG 1. ICEA mediated horizontal gene transfers (HGT) in *M. agalactiae*.** Schematic  
588 illustrating the two mechanisms of gene exchanges occurring upon mating experiments  
589 involving strain 5632 as ICE donor and strain PG2 as ICE recipient cells (7, 12) **(A)**. One of the  
590 three chromosomal ICEA copies of 5632 is transferred to PG2 and integrates randomly in the  
591 recipient genome (ICEA transfer). ICEA self-dissemination is associated with a second  
592 mechanism of gene exchange that occurs in the opposite direction from the recipient to the  
593 donor cells and involves large chromosomal DNA movements (Chromosomal transfer). ICEA  
594 transfer confers conjugative properties to the PG2 recipient cells (7). The 23 genes identified  
595 in ICEA are represented with their respective orientation and approximate nucleotide size  
596 **(B)**. The two inverted repeats (IR) flanking the ICEA are represented by black diamonds. The

597 genes encoding predicted surface lipoproteins or proteins with putative transmembrane  
598 domains are in black and grey, respectively. Hypothetical functions were deduced from  
599 putative conserved domains found in several ICEA products (Table S1).

600 **FIG 2. Functional analysis of mutant ICEAs in the 5632 and PG2 genetic backgrounds.**

601 Schematic illustrating the 51 mutant ICEAs generated by transposon mutagenesis in *M.*  
602 *agalactiae* strain 5632 (B) and the mutant ICEAs selected in PG2 upon mating with 5632 (A).

603 Individual mutant ICEAs are designated by their reference number together with the position  
604 of the mTn insertion (Table S2). The genes with no mTn insertion are indicated in white. ICEA  
605 genes found essential (red) or dispensable (green) are identified according to their genetic  
606 backgrounds that differ in their ICEA content (Fig. 1). Conjugative properties of selected  
607 mutant ICEAs in PG2 (C) and 5632 (D). Mating frequencies were calculated as the number of  
608 dual-resistant transconjugants per total CFUs (mating frequencies per single-resistant CFUs  
609 are provided in Table S3). Donor cells were mated with a pool of 5 ICEA-negative PG2 clones  
610 encoding resistance to puromycin (mating PG2 ICEA x PG2) or tetracycline (mating 5632 x  
611 PG2). Dual-resistant colonies were selected by using a combination of gentamicin and  
612 puromycin (mating PG2 ICEA x PG2), or gentamicin and tetracycline (mating 5632 x PG2). For  
613 matings PG2 ICEA x PG2 (C), the data represent means of at least three independent assays  
614 with the exception of mutant ICEA number 23 (9 independent assays). Since mutant ICEAs  
615 can be found integrated at different genomic positions, two PG2 ICEA transconjugants were  
616 used for mutant ICEA number 7 (ICEA at genomic position 395291 and 433901). Standard  
617 deviations are indicated by error bars. The asterisk indicates a mating frequency below the  
618 detection limit ( $1 \times 10^{-10}$  transconjugants per total CFUs). For matings 5632 x PG2 (D), the  
619 data represent the average of two independent assays. The genetic profile of the

620 transconjugants was determined using 10 to 166 dual-resistant colonies per mating, which  
621 for lower mating frequencies represent nearly all the progeny.

622 **FIG 3. Protein expression of PG2-ICEA mutants.** Immunostaining of *M. agalactiae* colonies  
623 showing CDS14 lipoprotein expression at the surface of 5632 cells (**A**). Colony blots were  
624 carried out by using a specific serum (anti-CDS14) and ICEA negative PG2 cells (PG2) were  
625 used as a negative control. Western blot analysis of CDS14 lipoprotein expression in 5632  
626 and PG2 ICEA cells (**B**). CDS14 lipoprotein expression in 5632 that contains three  
627 chromosomal ICEA copies (1) was not abrogated in a 5632 mutant harboring a *cds14* knock-  
628 out ICEA copy (2). CDS14 lipoprotein expression can be detected in PG2 transconjugants  
629 having acquired a mutant ICEA harboring a mTn inserted in *ncr19/E* (4), but not in PG2 (3) or  
630 PG2 transconjugants harboring a *cds14* knock-out ICEA (5). Transformation of PG2  
631 transconjugants harboring a *cds14* knock-out ICEA with a plasmid expressing CDS14 restored  
632 the expression of the lipoprotein (6). A specific serum raised against lipoprotein P80 was  
633 used as control (P80). Schematic illustrating the protein expression profile of selected  
634 mutant ICEAs in PG2 cells (**C**). Mutant ICEAs are identified by their reference number (Table  
635 S2) and ICEA products detected by proteomics (Table S4) are indicated (closed arrows).

636 **FIG 4. Overview of conjugative ICE transfer in *M. agalactiae*.** This schematic was adapted  
637 from Alvarez-Martinez and Christie (18), and illustrates the 5 key steps in ICEA transfer.  
638 Upon normal conditions, ICEA copies are found integrated into the host chromosome and  
639 most ICEA genes are not expressed. Among the few proteins expressed by chromosomal  
640 ICEAs is the CDS14 lipoprotein that is surface exposed and plays a critical role in initiating the  
641 conjugative process (1). When ICEA gene expression is induced, by specific cellular  
642 conditions or stochastically, the *cis*-acting DDE transposase is produced and one of the three

643 ICEA copies excises from the chromosome and forms a circular dsDNA molecule (2). ICEA  
644 circularization induces the expression of the conjugative module, whose products assemble  
645 into the mating pore, a simplified form of T4SS found in more complex bacteria (3). A protein  
646 complex, known as relaxosome, recognizes the origin of transfer (*oriT*) on the circular ICEA  
647 and a relaxase generates a linear ssDNA by nicking the ICEA DNA (4). Finally, the relaxosome  
648 complex interacts with the TraG-like (VirD4 homologue) energetic component found at the  
649 inner side of the membrane that facilitates the transfer of the ssDNA bound to the relaxase  
650 through the mating channel (5). Once in the recipient strain, the ICEA re-circularizes,  
651 becomes double stranded and integrates randomly into the host chromosome. The minimal  
652 functional ICEA encompasses 80% of the coding sequence and includes a gene cluster (*cds5*  
653 to *cds19*) encoding proteins with transmembrane domains that most likely represents a  
654 module associated with the conjugative channel. Additional essential ICEA determinants  
655 included the CDS14 surface lipoprotein, the CDSG putative partitioning protein and the DDE  
656 transposase (CDS22), together with several proteins of unknown functions (CDSs 1, A, C, and  
657 30).

658

659

#### SUPPLEMENTARY FIGURE LEGENDS

660 **FIG S1. Mutant ICEAs selected in PG2 occurs as a single ICEA copy randomly integrated in**  
661 **the host chromosome.** Southern blotting experiments (E. Dordet-Frisoni, M. S. Marena, E.  
662 Sagné, L. X. Nouvel, R. Guérillot, P. Glaser, A. Blanchard A, F. Tardy, P. Sirand-Pugnet, E.  
663 Baranowski, and C. Citti, Mol Microbiol 89:1226–1239, 2013, doi:10.1111/mmi.12341) with  
664 PG2 ICEA transconjugants failed to reveal multiple ICEA integrations. Mycoplasma genomic  
665 DNAs were restricted with *EcoRV* and hybridized with mTn *Gm*-specific (A) or ICEA *cds22*-

666 specific (**B**) probes. The identification of a single *Gm*-positive DNA fragment in PG2 ICEA  
667 transconjugants was in agreement with genomic DNA sequencing data indicating a single  
668 mutant-ICEA insertion in the PG2 chromosome. This result was further supported by DNA  
669 hybridization with the *cds22*-specific probe that also discarded any wild-type ICEA copy in  
670 PG2 ICEA transconjugants. Differences in size between *cds22*-positive DNA fragments are  
671 consistent with the random insertion of ICEA in the host chromosome. The digested ICEA  
672 circular form is indicated by an arrow. For each PG2 ICEA transconjugants, the size of *Gm*  
673 positive DNA fragments was in agreement with predicted values (**C**). The number in  
674 parenthesis indicates the size of the ICEA fragment with an inserted mTn. The *Gm*- and  
675 *cds22*-positive fragments are indicated by asterisks (\*: *Gm*-specific probe; \*\*: *cds22*-specific  
676 probe). Dashed lines indicate a fragment overlapping ICEA and genomic DNA.

677 **FIG S2. Global alignment of CDS14 lipoproteins found in ICEs of *M. agalactiae* strain 5632**  
678 **(5632) and *M. bovis* strain PG45 (PG45).** The alignment of CDS14 lipoprotein sequences  
679 derived from 5632 (MAGa5010) and PG45 (MBOVPG45\_0187) were performed by using  
680 Needleman-Wunsch global alignment. The 27 aa sequence characteristic of surface exposed  
681 lipoproteins is underlined.

682 **FIG S3. Plasmid constructions carrying *cds5* or truncated versions of *cds5*.** Schematics  
683 illustrating plasmid constructions carrying the full-length *cds5* (pO/T-CDS5), or truncated  
684 versions of *cds5* (pO/T-CDS5 N1, C1, N2 and C2). Truncated sequences are CDS5 N- and C-  
685 terminal regions resulting from mTn insertion in 5632[ICEA *cds5*::mTn]<sup>G11</sup> and 5632[ICEA  
686 *cds5*::mTn]<sup>G12</sup> (Fig. 2B and Table S2). Coding sequences were cloned downstream of the *M.*  
687 *agalactiae* lipoprotein P40 gene (MAG2410) promoter region (arrow).

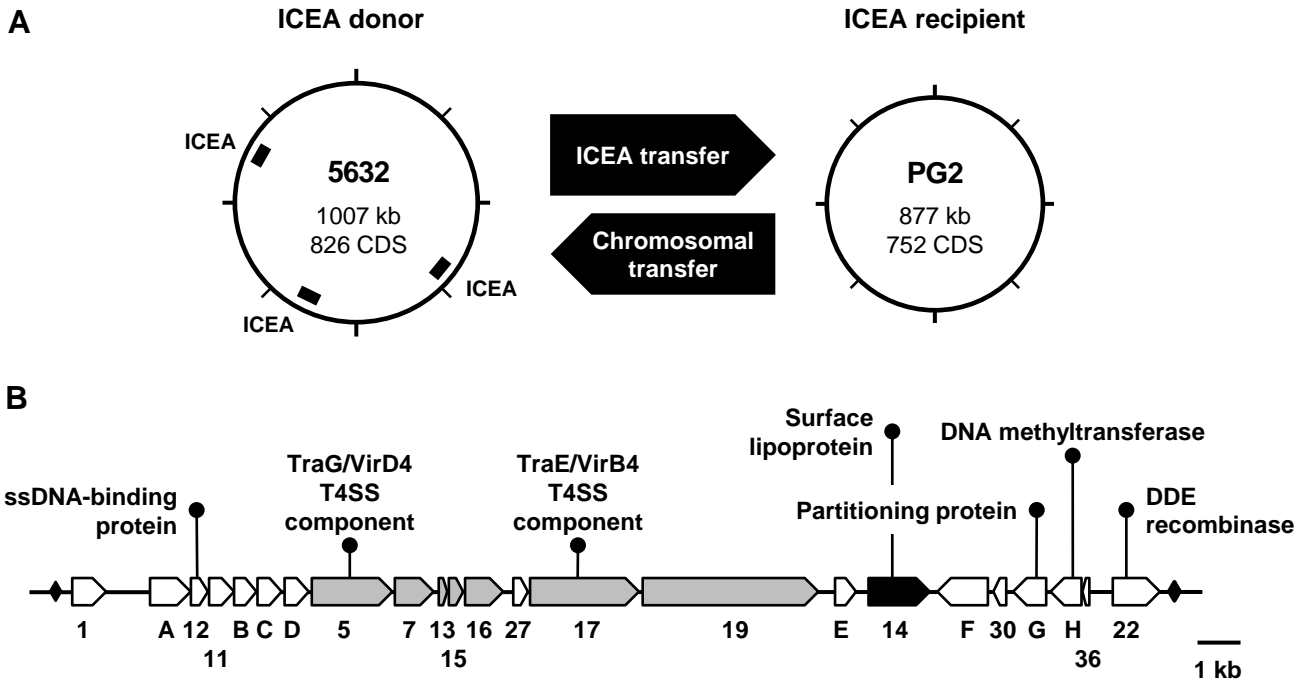

**FIG 1. ICEA mediated horizontal gene transfers (HGT) in *M. agalactiae*.** Schematic illustrating the two mechanisms of gene exchanges occurring upon mating experiments involving strain 5632 as ICE donor and strain PG2 as ICE recipient cells (7, 12) (A). One of the three chromosomal ICEA copies of 5632 is transferred to PG2 and integrates randomly in the recipient genome (ICEA transfer). ICEA self-dissemination is associated with a second mechanism of gene exchange that occurs in the opposite direction from the recipient to the donor cells and involves large chromosomal DNA movements (Chromosomal transfer). ICEA transfer confers conjugative properties to the PG2 recipient cells (7). The 23 genes identified in ICEA are represented with their respective orientation and approximate nucleotide size (B). The two inverted repeats (IR) flanking the ICEA are represented by black diamonds. The genes encoding predicted surface lipoproteins or proteins with putative transmembrane domains are in black and grey, respectively. Hypothetical functions were deduced from putative conserved domains found in several ICEA products (Table S1).



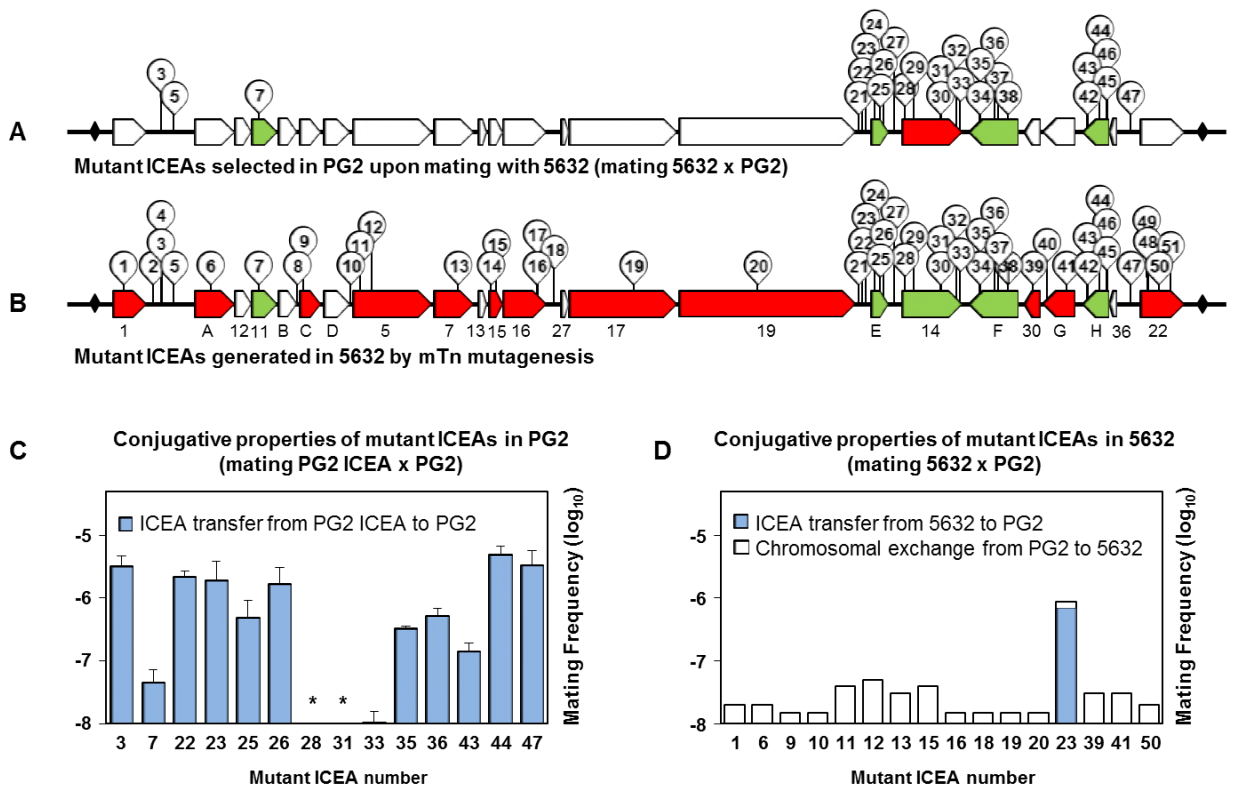

**FIG 2. Functional analysis of mutant ICEAs in the 5632 and PG2 genetic backgrounds.** Schematic illustrating the 51 mutant ICEAs generated by transposon mutagenesis in *M. agalactiae* strain 5632 (**B**) and the mutant ICEAs selected in PG2 upon mating with 5632 (**A**). Individual mutant ICEAs are designated by their reference number together with the position of the mTn insertion (Table S2). The genes with no mTn insertion are indicated in white. ICEA genes found essential (red) or dispensable (green) are identified according to their genetic backgrounds that differ in their ICEA content (Fig. 1). Conjugative properties of selected mutant ICEAs in PG2 (**C**) and 5632 (**D**). Mating frequencies were calculated as the number of dual-resistant transconjugants per total CFUs (mating frequencies per single-resistant CFUs are provided in Table S3). Donor cells were mated with a pool of 5 ICEA-negative PG2 clones encoding resistance to puromycin (mating PG2 ICEA x PG2) or tetracycline (mating 5632 x PG2). Dual-resistant colonies were selected by using a combination of gentamicin and puromycin (mating PG2 ICEA x PG2), or gentamicin and tetracycline (mating 5632 x PG2). For matings PG2 ICEA x PG2 (**C**), the data represent means of at least three independent assays with the exception of mutant ICEA number 23 (9 independent assays). Since mutant ICEAs can be found integrated at different genomic positions, two PG2 ICEA transconjugants were used for mutant ICEA number 7 (ICEA at genomic position 395291 and 433901). Standard deviations are indicated by error bars. The asterisk indicates a mating frequency below the detection limit ( $1 \times 10^{-10}$  transconjugants per total CFUs). For matings 5632 x PG2 (**D**), the data represent the average of two independent assays. The genetic profile of the transconjugants was determined using 10 to 166 dual-resistant colonies per mating, which for lower mating frequencies represent nearly all the progeny.

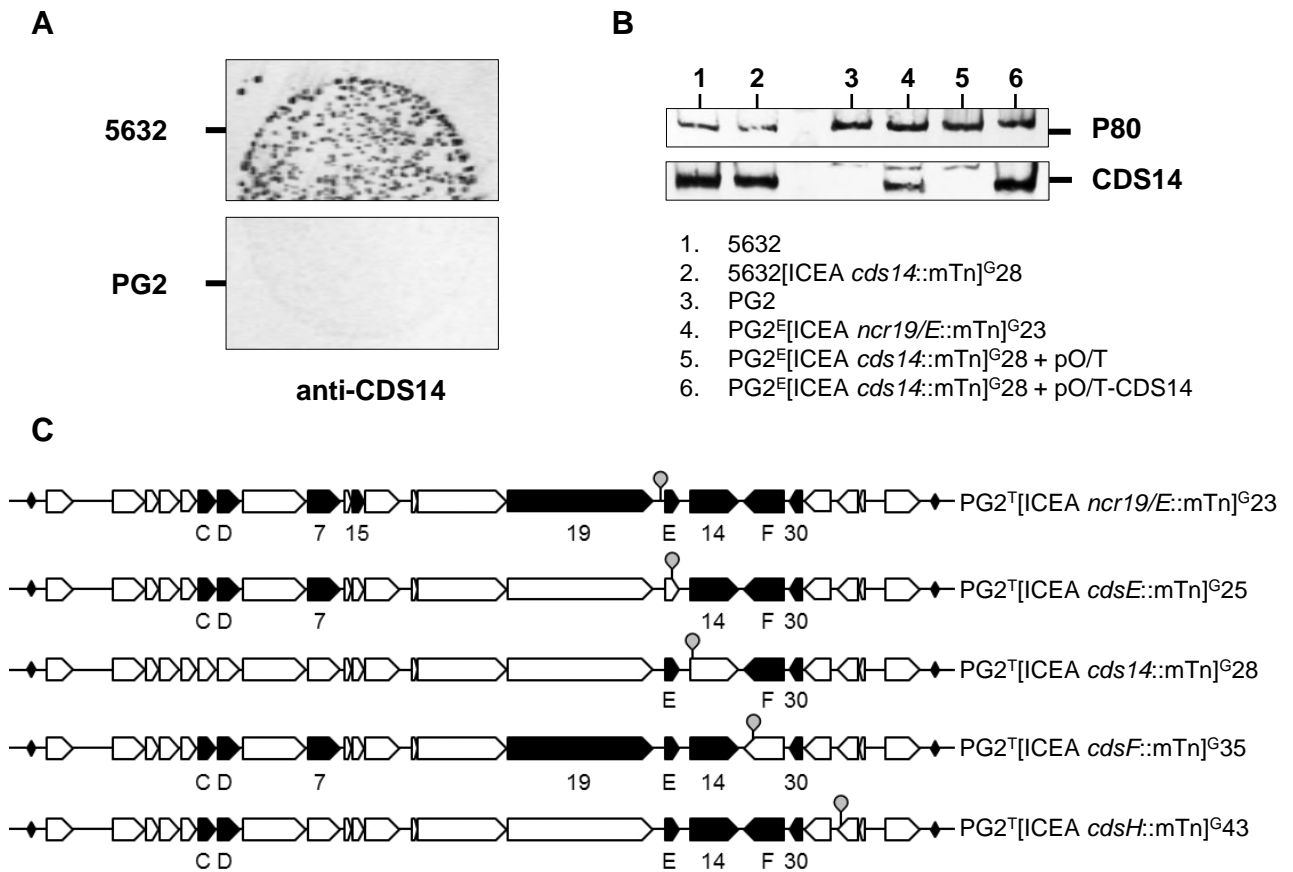

**FIG 3. Protein expression of PG2-ICEA mutants.** Immunostaining of *M. agalactiae* colonies showing CDS14 lipoprotein expression at the surface of 5632 cells (A). Colony blots were carried out by using a specific serum (anti-CDS14) and ICEA negative PG2 cells (PG2) were used as a negative control. Western blot analysis of CDS14 lipoprotein expression in 5632 and PG2 ICEA cells (B). CDS14 lipoprotein expression in 5632 that contains three chromosomal ICEA copies (1) was not abrogated in a 5632 mutant harboring a *cds14* knock-out ICEA copy (2). CDS14 lipoprotein expression can be detected in PG2 transconjugants having acquired a mutant ICEA harboring a mTn inserted in *ncr19/E* (4), but not in PG2 (3) or PG2 transconjugants harboring a *cds14* knock-out ICEA (5). Transformation of PG2 transconjugants harboring a *cds14* knock-out ICEA with a plasmid expressing CDS14 restored the expression of the lipoprotein (6). A specific serum raised against lipoprotein P80 was used as control (P80). Schematic illustrating the protein expression profile of selected mutant ICEAs in PG2 cells (C). Mutant ICEAs are identified by their reference number (Table S2) and ICEA products detected by proteomics (Table S4) are indicated (closed arrows).

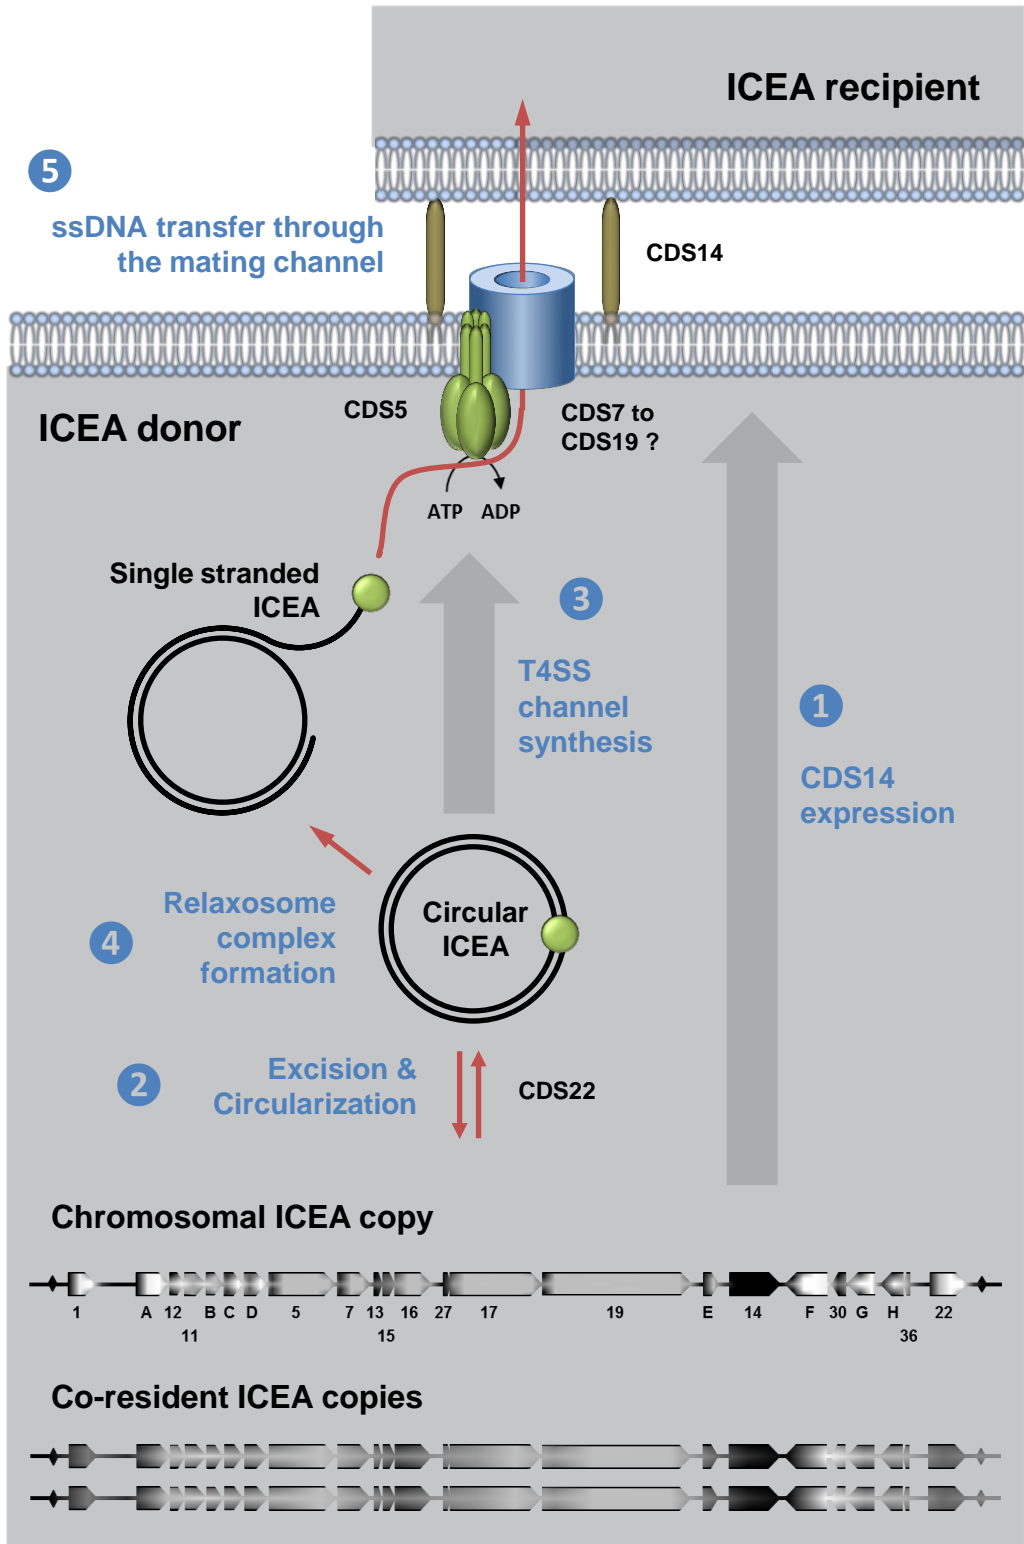

**FIG 4. Overview of conjugative ICE transfer in *M. agalactiae*.** This schematic was adapted from Alvarez-Martinez and Christie (18), and illustrates the 5 key steps in ICEA transfer. Upon normal conditions, ICEA copies are found integrated into the host chromosome and most ICEA genes are not expressed. Among the few proteins expressed by chromosomal ICEAs is the CDS14 lipoprotein that is surface exposed and plays a critical role in initiating the conjugative process (1). When ICEA gene expression is induced, by specific cellular conditions or stochastically, the *cis*-acting DDE transposase is produced and one of the three ICEA copies excises from the chromosome and forms a circular dsDNA molecule (2). ICEA circularization induces the expression of the conjugative module, whose products assemble into the mating pore, a simplified form of T4SS found in more complex bacteria (3). A protein complex, known as relaxosome, recognizes the origin of transfer (*oriT*) on the circular ICEA and a relaxase generates a linear ssDNA by nicking the ICEA DNA (4). Finally, the relaxosome complex interacts with the TraG-like (VirD4 homologue) energetic component found at the inner side of the membrane that facilitates the transfer of the ssDNA bound to the relaxase through the mating channel (5). Once in the recipient strain, the ICEA re-circularizes, becomes double stranded and integrates randomly into the host chromosome. The minimal functional ICEA encompasses 80% of the coding sequence and includes a gene cluster (*cds5* to *cds19*) encoding proteins with transmembrane domains that most likely represents a module associated with the conjugative channel. Additional essential ICEA determinants included the CDS14 surface lipoprotein, the CDSG putative partitioning protein and the DDE transposase (CDS22), together with several proteins of unknown functions (CDSs 1, A, C, and 30).
